# Supplementary material for: Telehealth Can Be Implemented Across a Musculoskeletal Service Line Without Compromising Patient Satisfaction
Source: PubMed Central journal article supplement (PMC8077987; doi:10.1177/1556331620977171), 2021-02-21
Supplement: sj-pdf-1-hss-10.1177_1556331620977171.pdf [file sj-pdf-1-hss-10.1177_1556331620977171.pdf]

1. How satisfied were you with your last in-office visit?
  - a. Very satisfied
  - b. Satisfied
  - c. Neutral
  - d. Dissatisfied
  - e. Very dissatisfied
2. How much time did this in-office visit require (in minutes) including travel?
3. How satisfied were you with your telemedicine visit?
  - a. Very satisfied
  - b. Satisfied
  - c. Neutral
  - d. Dissatisfied
  - e. Very dissatisfied
4. How much time did this telemedicine visit require (in minutes) including set up?
5. Would you use telemedicine for a visit in the future?
  - a. Yes
  - b. No
  - c. No preference
6. Would you have preferred to have in-office or telemedicine visits?
  - a. In-office
  - b. Telemedicine
  - c. No preference
7. How would you rate the ease-of-use in setting up/utilizing the telemedicine platform?
  - a. Very difficult
  - b. Somewhat difficult
  - c. Neutral
  - d. Somewhat easy
  - e. Very easy
8. On a scale of 1-5, please rate the following:
  - a. Physician's communication:
  - b. Physician's physical examination:
  - c. Physician's explanations of plan/options:
  - d. The amount of time you had to speak with the physician:
9. How would you rate your current pain level (VAS) <sup>†</sup>
10. Did you require assistance to get to your appointment/set up the telemedicine appointment? (Yes/No)
11. Did this visit require you to take off of work?
  - a. Yes
  - b. No
  - c. N/A

\*Associated scale values are as follows: 1 - very poor, 2 - poor, 3 - neutral, 4 - good, 5 - very good

<sup>†</sup>Standard 0-10 VAS pain scale was used
