# Supplementary material for: Telehealth Can Be Implemented Across a Musculoskeletal Service Line Without Compromising Patient Satisfaction
Source: HSS J. 2021 Feb 21;17(1):36–45. doi: 10.1177/1556331620977171 (PMC8077987; doi:10.1177/1556331620977171)
Supplement: sj-zip-2-hss-10.1177_1556331620977171 – Supplemental material for Telehealth Can Be Implemented Across a Musculoskeletal Service Line Without Compromising Patient Satisfaction [file sj-zip-2-hss-10.1177_1556331620977171.zip]

Archive with 13 entries (13 files):
- COI Wagner.pdf
- COI Spencer.pdf
- COI DeMaio.pdf
- COI Dawes.pdf
- COI Gottschalk.pdf
- COI Boden.pdf
- COI Manz.pdf
- COI Hammond.pdf
- COI Daly.pdf
- COI Greenfield.pdf
- COI Maughon.pdf
- COI Pombo.pdf
- COI Xerogeanes.pdf
